# Supplementary material for: Probing electron transfer dynamics of pyranine with reduced graphene oxide
Source: Royal Society of Chemistry journal article supplement (doi:10.1039/c4cp03225j), 2014-01-01
Supplement: c4cp03225j1.pdf [file c4cp03225j1.pdf]

## Supporting Information

### Probing electron transfer dynamics of pyranine with reduced graphene oxide

M. Asha Jhonsi<sup>a</sup>, C. Nithya<sup>b</sup>, A. Kathiravan<sup>c\*</sup>

<sup>a</sup> Department of Chemistry, B.S. Abdur Rahman University, Chennai – 600 048, Tamil Nadu, India

<sup>b</sup> Centre for Energy and Environmental Science and Technology, National Institute of Technology, Tiruchirappalli 620 015, Tamil Nadu, India

<sup>c</sup> National Centre for Ultrafast Processes, University of Madras, Taramani Campus, Chennai – 600 113, Tamil Nadu, India

\* Author for correspondence

E-mail address: [akathir23@hotmail.com](mailto:akathir23@hotmail.com) (Dr. A. Kathiravan)

#### Figure captions

**Figure S1:** (a) Absorption spectra of POH at different concentrations in water and (b) Lambert–Beer law plot

**Figure S2:** Absorption spectra of POH at various pH.

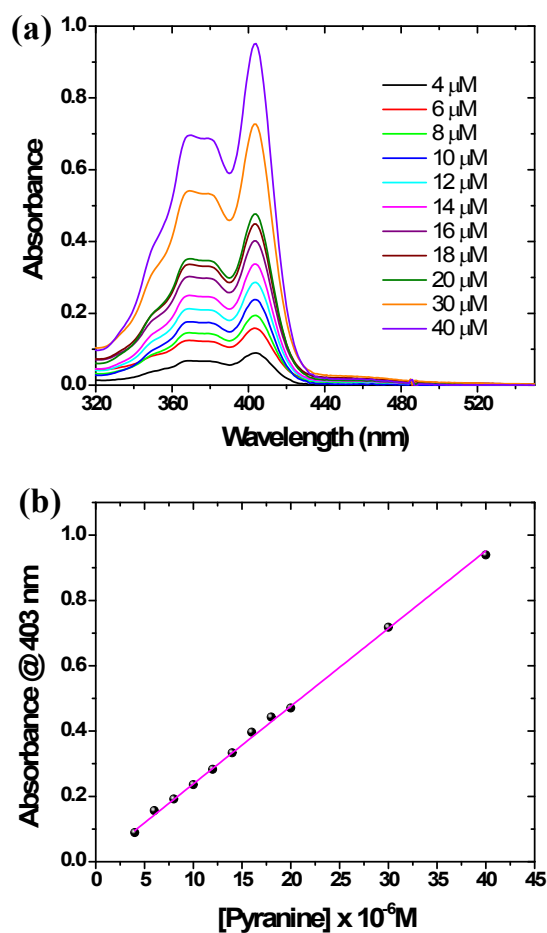

**Figure S1:** (a) Absorption spectra of POH at different concentrations in water and (b) Lambert-Beer law plot

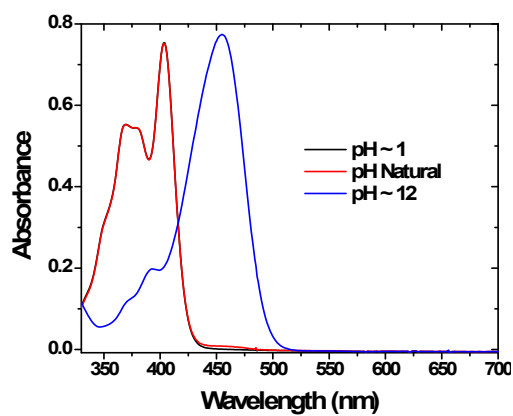

**Figure S2:** Absorption spectra of POH at various pH.
